# Supplementary material for: Detection and Characterization of Human Enteroviruses, Human Cosaviruses, and a New Human Parechovirus Type in Healthy Individuals in Osun State, Nigeria, 2016/2017
Source: PubMed Central journal article supplement (PMC6893832; doi:10.3390/v11111037), 2019-11-07
Supplement: viruses-11-01037-s001.pdf [file viruses-11-01037-s001.pdf]

## Supplementary material

### RT-PCR assay for typing enterovirus species C strains

Amplification of the VP3/VP1 junction region was performed using the One-Step-RT-PCR Kit (QIAGEN), followed by nested PCR using HotStarTaq-Mastermix (QIAGEN), according to the manufacturer's protocol. Reverse transcription PCR (RT-PCR) and nested PCR was done with 600 nM of forward and reverse primers as mentioned in Technical Appendix Table 1. The temperature profile for the VP1 region was the following: 45 min 45°C, 15 min 95°C for reverse transcription, followed by 10 touch-down cycles protocol of [30 s 94°C, 30 s 50°C, 90 s 72°C] with a decrease of 1°C of the annealing temperature per cycle, followed by 30 cycles of [30 s 94°C, 30 s 42°C, 90 s 72°C] and final elongation for 10 min at 72°C. The nested PCR was carried out by using a touchdown protocol with 10 cycles of [30 s 94°C, 30 s 52°C, 60 s 72°C, with a decrease of 1°C of the annealing temperature per cycle, followed by 30 cycles of [30s 94°C, 30 s 42°C, 60 s 72°C], and final elongation for 10 min at 72°C. The resulting PCR products of the nested PCR (785 bp) were directly sequence using primer NRZ 300 and NRZ 301.

**Table 1: Primers used for EV-C VP1 assay.**

| Primer  | Orientation | Sequence 5'-3'                     |
|---------|-------------|------------------------------------|
| NRZ 298 | Sense       | TAY TAY ACH CAY TGG RCN GGN TC     |
| NRZ 299 | Antisense   | TGC CAN GTR TAR TCR TCC CA         |
| NRZ 300 | Sense       | ATH TGG GAY VTN GGN YTN CAR TC     |
| NRZ 301 | Antisense   | CCD GGD GGN AYR TAC ATD ATY TGR TA |

### Full-genome sequencing of the HPeV genome

Two nested RT-PCR assays for the amplification of the near-full HPeV genome was conducted using the PrimeScript One Step RT-PCR Kit Ver.2 (TaKaRa Bio Inc.). The two overlapping PCR fragments were amplified by primer combinations listed in Table 2. First-round RT-PCR assay were done using 5 µl RNA, 800 nM primers NRZ 127 and NRZ 214 for PCR-A and NRZ 212 and NRZ 429 for PCR-B, 1 µl PrimeScript 1 step Enzyme Mix, 12.5 µl 2X 1 step buffer, and 4.5 µl RNase free dH<sub>2</sub>O. Reverse transcription was done at 50°C for 30 min followed by 94°C for 2 min. Amplification was done by 45 cycles at [94°C for 30 sec, 50°C for 30 sec, and 72°C for 300 sec]. Final elongation was one for 10 min at 72°C. Second-round semi-nested PCR used 800 nM primer NRZ129 and NRZ214 for PCR-A and NRZ 212 and NRZ 430 for PCR-B, 1 µl PrimeScript 1 step Enzyme Mix, 12.5 µl 2X 1 step buffer, and 7.5 µl RNase free dH<sub>2</sub>O and 2 µl of the first-round RT-PCR product. Temperature profile was 2 min 94°C, followed by 45 cycles at [94°C for 30 sec, 50°C for 30 sec, and 72°C for 300 sec] and final elongation for 10 min at 72°C.

To amplify the very 3'end of the HPeV genome the One-Step-RT-PCR Kit (QIAGEN) and HotStarTaq-Mastermix (QIAGEN) according to the manufacturer's protocol. Reverse transcription PCR (RT-PCR) was done with 600 nM of primer NRZ 431 and 15T-aTag under following conditions: 30 min 50°C, 15 min 95°C followed by 35 cycles of [30 sec 94°C, 30 sec 55°C, 60 sec 72°C] and a final elongation of 72°C. Semi-nested PCR was done using primer NRZ 432 and 15T-aTag under following conditions: 15 min 95°C followed by [30 sec 94°C, 30 sec 60°C, 30 sec 72°C] and a final elongation for 10 min at 72°C. The resulting PCR product of 441 bp was directly sequenced using the ABI BigDye 3.1 kit with primers NRZ 431 and NRZ 432.

**Supplementary Material Table 2:** Primers used for amplification of the nearly full genome of the novel HPeV strain

| Primer   | Orientation | Sequence 5'-3'                         | Reference                   |
|----------|-------------|----------------------------------------|-----------------------------|
| NRZ 127  | sense       | GGGTGGCAGATGGCGTGCCATAA                | 253, Harvala et al., [1]    |
| NRZ 214  | antisense   | TAGTGYTTGTARAAACCY CTATCTA             | DiCristanziano, et al., [2] |
| NRZ 212  | sense       | GACAATAGTTTTGAAATNACWATMCC             | DiCristanziano et al., [2]  |
| NRZ 429  | antisense   | TCAAACACCATGGGCATCAAYTTAG              | this study                  |
| NRZ 129  | sense       | YCACACAGCCATCCTCTAGTAAG                | 313, Harvala et al., [1]    |
| NRZ 430  | antisense   | ACMACATCATAATCATCCAC                   | this study                  |
| NRZ 431  | sense       | CCATAYAAAGATTGGCACTTYATGATY AAT GC     | this study                  |
| NRZ 432  | sense       | CCAGAGAAACTGCARAGTATCATGGCAGATTCATTTGG | this study                  |
| 15T-aTag | antisense   | GCCAACGACCGGGAGGCCAGCTTTTTTTTTTTTTTV   | Müller et al., [3]          |

The products of the semi-nested PCR assays (PCR-A = 2792 bp, PCR-B = 5123 bp) were purified using magnetic beads using MagSi-NGS<sup>PREP</sup> Plus (Steinbrenner Laborsysteme GmbH, Wiesenbach, Germany). NexteraXT library preparation and Illumina sequencing were performed. DNA was quantified using the Qubit dsDNA HS Assay Kit (Life Technologies, Darmstadt, Germany) and shotgun DNA libraries were generated with the Nextera XT DNA Sample Preparation Kit (Illumina, San Diego, CA, USA). Library size was determined with High Sensitivity DNA Analysis Kits for the 2100 Bioanalyzer Instrument (Agilent Technologies, Waldbronn, Germany). Libraries were quantified using the KAPA Library Quantification Kit for Illumina (Kapa Biosystems, Wilmington, MA, USA) and pooled before sequencing. The library pool was sequenced on a MiSeq instrument (Illumina, San Diego, CA, USA) in a paired end sequencing run using the MiSeq Reagent Kit v3 600 cycle kit. Sequencing data underwent quality control using an in-house quality control pipeline based on Trimmomatic 0.32<sup>26</sup> and FastQC 0.11.2 (<http://www.bioinformatics.babraham.ac.uk/projects/fastqc/>). Trimmed reads were mapped to parechovirus strain AB252582 and JX826607 separately using the “Map to Reference” algorithm in Geneious version 11.1.5.

**Supplementary Material Figure 1:** Phylogenetic tree using the VP1 region of enterovirus strains detected in this study compared to reference strains of species EV-B and EV-C available in GenBank. The evolutionary history was inferred using the Maximum Likelihood method based on a GTR model. Enterovirus strains identified within this study are marked with filled circles. Subtrees are shown in Figure 2 in the manuscript text.

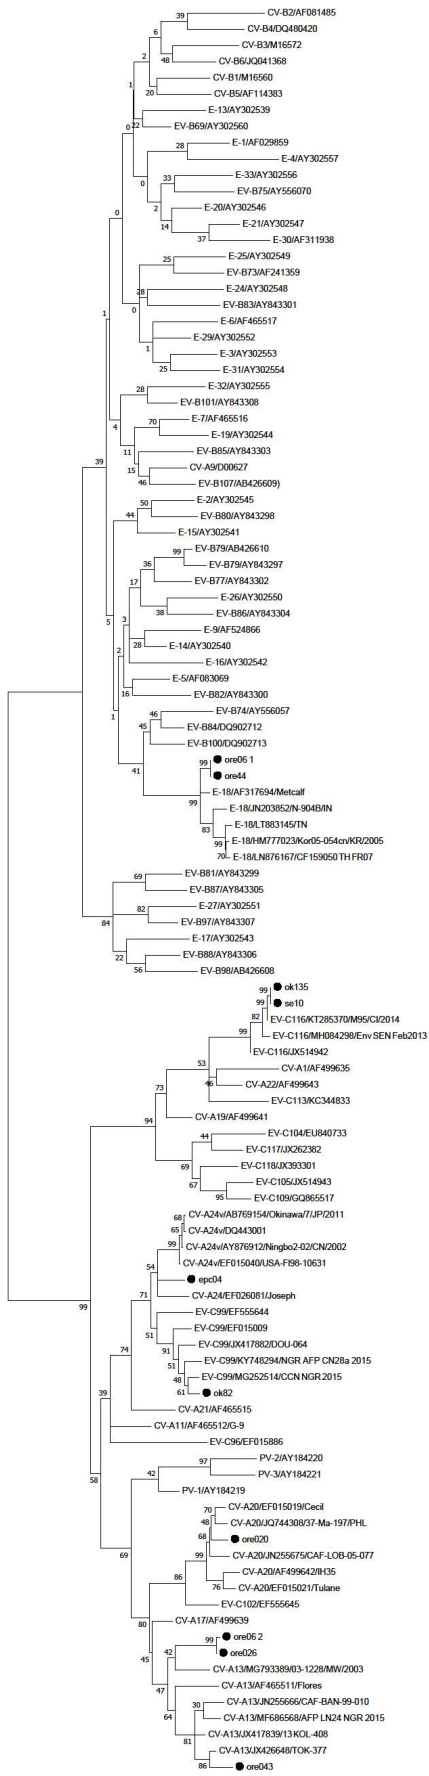

0.2

**Supplementary Material Table 2: Characteristics of patients with cosavirus positive samples and molecular results**

| Sample ID | Name of location | Type of Location | Age (Y) | Sex    | Collection date | 5'NCR seq   |
|-----------|------------------|------------------|---------|--------|-----------------|-------------|
| OK 132    | Okeosun          | Semi--urban      | 70      | Male   | Mar,2016        | Cosavirus D |
| BS 018    | Ede              | Urban            | 15-25   | Female | July,2016       | Cosavirus A |
| IS 004    | Ede              | Urban            | 15-25   | Male   | July,2016       | Cosavirus D |
| EPC 17    | Ede              | Urban            | 22      | Female | Sep,2016        | Cosavirus D |
| SE 03     | Okeosun          | Semi--urban      | 43      | Male   | Feb,2016        | Cosavirus A |
| ORE 043   | Ore              | Rural            | 4       | Female | May,2017        | Cosavirus A |
| ORE 09    | Ore              | Rural            | 4       | Female | May,2017        | Cosavirus D |
| ORE 44    | Ore              | Rural            | 5       | Female | May,2017        | Cosavirus D |
| OK 84     | Okeosun          | Semi--urban      | 6       | Male   | Mar,2016        | Cosavirus D |
| ORE 010   | Ore              | Rural            | 7       | Female | May,2017        | Cosavirus A |
| ORE 032   | Ore              | Rural            | 7       | Male   | May,2017        | Cosavirus A |
| ORE 030   | Ore              | Rural            | 8       | Male   | May,2017        | Cosavirus D |
| ORE 019   | Ore              | Rural            | 9       | Female | May,2017        | Cosavirus A |
| OK 68     | Okeosun          | Semi--urban      | 10      | Female | Mar,2016        | Cosavirus D |
| ORE 017   | Ore              | Rural            | 10      | Female | May,2017        | Cosavirus D |
| ORE 045   | Ore              | Rural            | 10      | Female | May,2017        | Cosavirus D |
| ORE 33    | Ore              | Rural            | 10      | Male   | May,2017        | Cosavirus D |
| OK 78     | Okeosun          | Semi--urban      | 11      | Female | Mar,2016        | Cosavirus D |
| ORE 020   | Ore              | Rural            | 11      | Female | May,2017        | Cosavirus D |
| OK 72     | Okeosun          | Semi--urban      | 11      | Male   | Mar,2016        | Cosavirus D |
| ORE 22    | Ore              | Rural            | 12      | Female | May,2017        | Cosavirus A |
| ORE BIO   | Ore              | Rural            | 12      | Female | May,2017        | Cosavirus D |
| ORE 035   | Ore              | Rural            | 14      | Male   | May,2017        | Cosavirus D |
| ORE TAO   | Ore              | Rural            | 14      | Male   | May,2017        | Cosavirus D |
| OK 71     | Okeosun          | Semi--urban      | 10      | Male   | Mar,2016        | Cosavirus D |
| OK 155    | Okeosun          | Semi--urban      | 46      | Male   | Mar,2016        | Cosavirus D |
| OK 35     | Okeosun          | Semi--urban      | 50      | Female | Mar,2016        | Cosavirus D |
| OK 42     | Okeosun          | Semi--urban      | 50      | Female | Mar,2016        | Cosavirus D |
| S 012     | Ede              | Urban            | 50      | Male   | Feb,2016        | Cosavirus A |
| OK 59     | Okeosun          | Semi--urban      | 59      | Female | Mar,2016        | Cosavirus D |
| OK 146    | Okeosun          | Semi--urban      | 60      | Female | Mar,2016        | Cosavirus D |
| OK 116    | Okeosun          | Semi--urban      | 61      | Female | Mar,2016        | Cosavirus A |
| OK 153    | Okeosun          | Semi--urban      | 65      | Female | Mar,2016        | Cosavirus D |

**References:**

1. Harvala, H. Epidemiology and clinical associations of human parechovirus respiratory infections Evaluation Studies. *J Clin Microbiol.* 2008, 46(10):3446-53. doi: 0.1128/JCM.01207-08. PMID: 18753351
2. Di Cristanziano, V.; Böttcher, S.; Diedrich, S.; Timmen-Wego, M.; Knops, E.; Lübke, N.; Kaiser, R.; Pfister, H.; Kaboré, Y.; D'Alfonso, R. Detection and characterization of enteroviruses and parechoviruses in healthy people living in the South of Côte d'Ivoire *J Clin Virol* 2015, 72:153. doi: 10.1016/j.jcv.2015.10.005.
3. Müller, B.; Klemm, U; Mas Marques, A; Schreier, E. Genetic diversity and recombination of murine noroviruses in immunocompromised mice. *Arch Virol.* 2007, 152(9):1709-19. DOI: 10.1007/s00705-007-0989-y
